# Supplementary material
Source: publisher figshare collection journal article supplement (https://tandf.figshare.com/ndownloader/files/24977860)
Supplement: Supplementary file 1 [file 24977860]

## Sheet: 1,5-fold down
Table S3. Proteins with significantly decreased levels in IVM-CDM versus CDM, in both BHN100 and BHN418
Selection criteria: >1.5 fold downregulated in IVM-CDM versus CDM and a q-value < 0.05, in both BHN100 and BHN418.
CDM: Chemically defined medium; IVM-CDM: in vivo-mimicking CDM
Protein FDR HIGH	false discovery rate on protein level <1%
na	not available (or only available in one condition per strain)
	p-value or q-value <0.05 = significant
q-value	Benjamini-Hochberg corrected
	ratio >1.5 between two conditions; increased level
	ratio <0.67 between two conditions; decreased level
ON	protein detected in at least 2 replicates of in one growth condition of one strain and not detected in the other growth condition of the same strain
OFF	protein not detected in one growth condition of one strain and detected in at least 2 replicates in the other growth condition of the same strain
	accessions with sp_x refer to proteins that were reannotated using a non-TIGR4 strain as background
Protein properties								Identification overview							Median normalized protein intensities												Quantitative comparative analysis
Accession	Gene	GI number	Description	Localization prediction (PsortB)	Number of amino acids	MW [kDa]	Calc. pI	Sequence coverage [%]	Number of peptide spectrum matches	Number of Unique Peptides	Protein FDR Confidence Combined	Exp q-value Combined	Sum PEP Score	Score Sequest HT Sequest HT	BHN100 CDM1	BHN100 CDM2	BHN100 CDM3	BHN100 IVMCDM1	BHN100 IVMCDM2	BHN100 IVMCDM3	BHN418 CDM1	BHN418 CDM2	BHN418 CDM3	BHN418 IVMCDM1	BHN418 IVMCDM2	BHN418 IVMCDM3	Average BHN100CDMIVM / BHN100CDM	P-value BHN100CDMIVM / BHN100CDM	Q-Value BHN100CDMIVM / BHN100CDM	Average BHN418CDMIVM / BHN418CDM	P-value BHN418CDMIVM / BHN418CDM	Q-Value BHN418CDMIVM / BHN418CDM	Annova p-value	Annova q-value
SP_0035	SP_0035	15899981	aromatic amino acid aminotransferase	Cytoplasmic	389	43.2	5.25	57	314	23	High	0	150.12	1048.56	250394288	294051808	285237024	170979296	166404368	154066384	154046768	140766256	152768688	86339720	78376616	79412608	0.592335	0.000861	0.0082289	0.54544	0.000131158	0.00307696	8.12212e-08	1.70417e-06
SP_0083	rr8	15900027	DNA-binding response regulator	Cytoplasmic	232	26.7	5.49	31	29	5	High	0	20.198	66.32	8.21426e+06	7.45745e+06	8.34195e+06	2912496	3044749	4.30491e+06	8972368	8754372	8564153	5.88212e+06	5.66403e+06	5.37785e+06	0.427347	0.00253265	0.0149684	0.643721	0.000112873	0.00291233	2.72095e-05	0.000119602
SP_0095	SP_0095	15900038	conserved_hypothetical_protein	Cytoplasmic	328	37.9	5.24	57	320	22	High	0	165.769	1074.06	381403488	403058112	410079744	77208952	102442440	74199080	438383584	397341568	547458048	67870832	72364280	92871432	0.212509	0.000114822	0.00305571	0.168529	0.000188948	0.00363339	4.08918e-07	5.22024e-06
SP_0159	SP_0159	15900097	hypothetical protein	CytoplasmicMembrane	420	45.9	9.17	6	21	3	High	0.002	8.589	56.35	33262218	32381062	32670936	15583024	14685161	13745430	26592338	25156792	31281798	13019848	10812497	14261893	0.447683	2.66705e-05	0.00179235	0.458796	0.00170834	0.0108318	4.14164e-06	2.97603e-05
SP_0179	ruvA	15900116	Holliday junction DNA helicase RuvA	Cytoplasmic	197	21.6	6.8	31	56	7	High	0	25.144	134.93	24806886	23414784	24287064	12295562	12354143	10622331	15381049	13668451	14317293	5054294	4.79154e+06	4.99312e+06	0.486452	0.000159678	0.00326639	0.342173	9.35875e-06	0.000844447	3.97118e-09	2.07192e-07
SP_0182	SP_0182	15900119	methylcrotonoyl-CoA carboxylase	Cytoplasmic	343	38.8	4.98	31	85	10	High	0	64.363	235.18	43954656	38587044	36651172	18901942	20868714	20531576	20777034	24297412	19447196	8.31145e+06	8124305	9772421	0.505921	0.000397911	0.00527566	0.406192	0.000514665	0.00580483	3.58696e-07	4.62833e-06
SP_0192	SP_0192	15900129	hypothetical protein	Unknown	88	10.2	5.01	80	107	7	High	0	54.991	391.4	60613240	64324412	55496800	35362112	29081694	33158988	67312752	50316864	68935936	33738572	34699084	27422258	0.540932	0.00101214	0.008882	0.513814	0.006213	0.0248995	0.000175989	0.000525341
SP_0197	SP_0197	15900133	dihydrofolate synthetase	Cytoplasmic	416	46.7	5.12	31	36	11	High	0	48.468	80.8	9605492	7.41312e+06	10599985	5231302	4897676	5.49516e+06	4.37309e+06	3.97147e+06	4269545	2.596e+06	2591677	2.60673e+06	0.565711	0.00744109	0.0311558	0.617912	7.77304e-05	0.00260508	2.49346e-06	1.99476e-05
SP_0204	SP_0204	15900140	acetyltransferase	Cytoplasmic	168	19	5.43	33	34	4	High	0	23.94	99.06	17020984	14863450	15593293	4498869	5079958	4581849	24739620	31412482	24280132	6372080	6068496	6475113	0.298259	2.49575e-05	0.00179235	0.235175	7.15774e-05	0.00246942	2.97182e-08	8.29344e-07
SP_0267	SP_0267	15900201	hypothetical protein	Cytoplasmic	349	38.9	5.69	58	67	14	High	0	62.151	191.76	24088048	22479448	20528712	15282053	10834078	14296196	25268768	22683150	23984306	8740503	6356009	8236829	0.602304	0.0109769	0.0399123	0.324361	0.000381555	0.00506064	2.04653e-05	9.5558e-05
SP_0292	SP_0292	15900226	bifunctional folate synthesis protein	Cytoplasmic	270	31.1	5.21	22	39	6	High	0	29.184	110.82	7.70065e+06	7.61274e+06	7.92483e+06	4.99665e+06	4.01668e+06	4.67414e+06	14856026	11413900	15797223	8.26097e+06	7.41553e+06	8836213	0.589007	0.0012516	0.0097291	0.582705	0.00890953	0.031384	1.64966e-05	8.04713e-05
SP_0459	pfl	15900375	formate acetyltransferase	Cytoplasmic	774	87.8	5.25	67	775	51	High	0	370.805	2656.77	762792192	1012513088	910684096	394640736	355338304	343245952	390024704	353822304	397891648	268827616	235853088	245921584	0.40701	0.000645362	0.00690365	0.65742	0.00137239	0.00963963	1.0634e-06	1.07233e-05
SP_0552	SP_0552	15900464	hypothetical protein	Cytoplasmic	159	17.7	4.67	34	53	5	High	0	35.045	197.85	39399176	43393576	42032268	27712554	29588810	22272002	44945588	31625658	44690100	21556162	21440242	20239512	0.637479	0.00724071	0.0306141	0.521485	0.0056426	0.0236385	0.000477573	0.0012116
SP_0599	SP_0599	15900507	transmembrane protein Vexp1	CytoplasmicMembrane	425	46.5	6.11	43	98	18	High	0	94.734	252.61	88644024	90821368	92719216	36129288	45005684	44575968	8087735	8.1412e+06	7764617	2310663	2.22104e+06	1.23138e+06	0.461859	0.000436944	0.00553778	0.240193	0.00199689	0.0118901	2.71372e-08	7.76829e-07
SP_0600	SP_0600	15900508	ABC transporter ATP-binding protein	CytoplasmicMembrane	215	23.8	8.48	52	131	9	High	0	69.718	471.52	321167072	349682944	331896576	132259992	111578552	106852752	52965352	55653496	57898164	18364292	19389502	20612800	0.349731	0.000111066	0.00305571	0.350514	1.5485e-05	0.00121093	2.15403e-10	2.87204e-08
SP_0601	SP_0601	15900509	transmembrane protein Vexp3	CytoplasmicMembrane	459	50	8.79	49	276	29	High	0	201.105	881.57	239369264	291414976	244028576	153971344	129852136	136825056	30303482	36618912	31281798	21428382	21974980	22385904	0.542903	0.00162264	0.0115789	0.669923	0.00267892	0.0141548	1.38581e-09	9.78221e-08
SP_0626	brnQ	15900533	branched-chain amino acid transport system II carrier protein	CytoplasmicMembrane	441	46.6	8.87	13	35	5	High	0	23.76	109.14	15282741	21289550	22568702	2.32053e+06	752791	648951	63687508	55653496	64994016	7.30309e+06	4890529	10614718	0.0629389	0.00223747	0.0139103	0.123733	0.000734533	0.00664689	1.35949e-05	7.00169e-05
SP_0726	thiD	15900623	phosphomethylpyrimidine kinase (EC:2.7.4.7)	Cytoplasmic	263	28.3	6.43	50	102	13	High	0	68.1	259.3	24088048	19824016	23320444	12639930	11543446	10898049	37480332	34709600	35916068	18619398	21261986	17718616	0.521793	0.000939442	0.00855773	0.53281	0.000423946	0.0053472	1.28059e-06	1.18209e-05
SP_0730	spxB	15900627	pyruvate oxidase	CytoplasmicMembrane	591	65.2	5.17	67	1502	47	High	0	479.456	5906.22	3645980160	5090231296	4248296704	2328943104	2124805376	2168715776	4201787392	2849033728	3677136896	2379950080	2142407552	2080052224	0.510028	0.0026957	0.0156583	0.61544	0.0172779	0.0489541	0.000587362	0.00143551
SP_0731	SP_0731	15900628	hypothetical protein	Unknown	115	12.9	4.98	31	12	2	High	0.002	8.118	31.92	3578790	2.48713e+06	3.96214e+06	1.6749e+06	1.6784e+06	1.4365e+06	2.64115e+06	2379600	2.52124e+06	850178	1.3515e+06	1.22194e+06	0.47764	0.00863824	0.034143	0.453942	0.00495323	0.0216515	0.000378104	0.000996452
SP_0766	sodA	15900660	superoxide dismutase, manganese-dependent	Extracellular	201	22.4	5.06	49	196	10	High	0	76.955	702.52	277230848	275615616	287406176	90512872	81940008	79934064	351404928	256785616	300453632	92465264	78111416	83218776	0.30037	7.38233e-06	0.00137127	0.279312	0.000249393	0.00411589	1.49292e-07	2.45411e-06
SP_0791	SP_0791	15900684	aldo/keto reductase	Cytoplasmic	308	35.1	6.43	25	22	5	High	0	16.17	31.07	11211803	9936303	11520921	7.36795e+06	6.17378e+06	5.9285e+06	12418673	11027526	11850513	7290498	6.33804e+06	6.06257e+06	0.595984	0.00299157	0.0169328	0.557874	0.000862749	0.00755227	4.38523e-05	0.000176914
SP_0867	SP_0867	15900750	ABC transporter ATP-binding protein	Cytoplasmic	256	28.4	4.72	66	243	16	High	0	137.271	839.42	257967968	294051808	249449792	99931952	112593344	112305176	270253472	219031968	240404368	111004728	121535848	104282024	0.405294	0.00014492	0.0031292	0.461597	0.00051222	0.00580483	1.26934e-06	1.18078e-05
SP_0868	SP_0868	15900751	hypothetical protein	Cytoplasmic	420	46.2	4.92	37	134	13	High	0	81.44	443.48	72469312	80369856	74799800	37511372	32631180	36814228	86965456	70735048	83519656	43013804	43045884	35901600	0.469853	0.00014357	0.0031292	0.505602	0.00145839	0.00986766	5.20103e-06	3.46736e-05
SP_0869	SP_0869	15900752	class-V aminotransferase	Cytoplasmic	408	45.2	5.15	29	56	8	High	0	41.389	168.01	18105682	12535899	11842240	6.46703e+06	5.29263e+06	5.12624e+06	23549728	18195300	20236290	8450200	7810344	8349215	0.397467	0.00388303	0.0200403	0.397051	0.000308736	0.00447095	2.36048e-05	0.000106596
SP_0871	SP_0871	15900754	intein-containing protein	Cytoplasmic	470	52.7	5	65	300	29	High	0	176.865	1024.17	163295264	172017200	164948752	83776536	72603272	75747000	190847872	147841056	175419040	85818584	85357840	79598112	0.464011	7.07254e-05	0.00266019	0.487786	0.000832252	0.00734009	1.74704e-06	1.51916e-05
SP_1008	pepT	15900880	peptidase T (EC:3.4.11.4)	Cytoplasmic	407	44.8	4.69	63	243	26	High	0	162.615	808.05	152181072	159693104	154125936	106222728	101427560	104126424	173113456	157929216	170495280	83865072	76696856	83218776	0.669049	3.38805e-05	0.00185931	0.486066	5.71996e-05	0.00239626	4.14543e-08	1.01521e-06
SP_1025	SP_1025	15900896	hypothetical protein	Cytoplasmic	324	37.1	4.97	51	155	15	High	0	76.483	438.42	63863476	53323976	59915968	35208772	35775288	34712764	60065356	52359508	60559160	34253028	32655014	35808536	0.596808	0.000659495	0.00692884	0.593792	0.000659996	0.00639815	7.21011e-06	4.43795e-05
SP_1027	SP_1027	15900898	conserved_hypothetical_protein	Unknown	324	35.4	5.64	42	80	14	High	0	76.357	248.81	36404440	36433152	35467644	22538194	22997796	25110128	36681768	36353992	33549664	22834828	20727090	20519496	0.652287	0.000237268	0.00406844	0.601221	0.000328519	0.00458754	1.34024e-06	1.2184e-05
SP_1160	SP_1160	15901025	lipoate-protein ligase	Cytoplasmic	329	37.7	5.81	59	183	23	High	0	92.57	479.96	71694120	79377824	79116624	57278456	39933768	38641268	71882344	60868400	67950536	43788088	38074828	35901600	0.590183	0.0141343	0.047358	0.586765	0.00221234	0.0125241	0.00065102	0.00158463
SP_1161	dldh	15901026	acetoin dehydrogenase complex, E3 component, dihydrolipoamide dehydrogenase	Cytoplasmic	567	60.4	4.92	53	322	30	High	0	196.909	1124.32	206238240	280876800	233189584	142075824	153203728	140455312	152686528	144810800	163601776	89206312	100368712	88324008	0.604931	0.00617779	0.027705	0.602688	0.000726291	0.00664689	1.46895e-05	7.37546e-05
SP_1162	SP_1162	15901027	dihydrolipoamide acetyltransferase	Cytoplasmic	347	38.1	6.57	30	79	12	High	0	53.402	249.77	25740720	30245444	28047928	17542444	13570282	10989971	22360798	20848858	23491184	15816209	13496358	14916108	0.501019	0.00778563	0.0316308	0.66309	0.00205427	0.0120714	0.000522188	0.00130005
SP_1164	SP_1164	15901029	acetoin dehydrogenase, E1 component subunit alpha	Cytoplasmic	322	35.1	5.24	31	41	7	High	0	38.766	120.32	23800442	27173312	25576224	13959513	14279725	14112620	15118499	12625407	15402580	10295064	6.99365e+06	7.61855e+06	0.553258	0.000109367	0.00305571	0.577272	0.0137138	0.0417827	2.43489e-05	0.000108217
SP_1243	zwf	15901104	glucose-6-phosphate 1-dehydrogenase (EC:1.1.1.49)	Cytoplasmic	495	56.8	5.66	59	315	28	High	0	152.327	919.84	188944720	193941648	205014576	126094344	113608384	105944120	143167584	135197920	134055904	84385920	71126072	86467696	0.587934	0.000680747	0.00702435	0.586729	0.0011637	0.00880657	3.37806e-06	2.51781e-05
SP_1374	aroC	15901228	chorismate synthase (EC:4.2.3.5)	Cytoplasmic	388	42.8	6.24	65	264	24	High	0	162.796	962.28	127118832	135182784	130327200	81585952	78895336	79114888	130808880	122005128	126176328	85297696	74663504	82383392	0.610236	1.88383e-05	0.00179235	0.639448	0.000553799	0.00596028	5.08426e-07	6.04071e-06
SP_1375	aroB	15901229	3-dehydroquinate synthase (EC:4.2.3.4)	Cytoplasmic	355	38.9	5.54	57	113	15	High	0	82.612	440.65	90047976	94568112	88615808	59140816	50585300	49868236	85886640	84161168	83322368	51928748	53154572	51536372	0.584099	0.000739656	0.00737127	0.618146	3.07464e-06	0.000515222	1.12716e-06	1.12716e-05
SP_1458	trxB	15901308	thioredoxin reductase	Cytoplasmic	303	33.1	4.88	49	167	10	High	0	78.445	543.27	96360096	110127040	111949384	65514092	54947844	59351120	95197656	68662104	89529720	58272524	46239620	49397240	0.564675	0.00119658	0.00946685	0.607402	0.0153533	0.0447995	0.000320523	0.00086628
SP_1499	bta	15901346	bacterocin transport accessory protein	Unknown	115	12.9	5.92	81	210	11	High	0	104.775	846.91	272416928	214685328	270052352	136533024	122744928	136825056	318354208	259757984	288640768	156739344	136514736	123752800	0.523147	0.00169481	0.0117628	0.481114	0.00125089	0.00900423	3.15895e-05	0.000134902
SP_1501	SP_1501	15901348	amino acid ABC transporter ATP-binding protein	CytoplasmicMembrane	209	23.1	5.06	77	116	13	High	0	100.053	503.9	151486240	181802832	171443616	116937568	104472720	94125792	201773408	134691488	173449840	76317416	66437088	79969440	0.625155	0.00467486	0.022712	0.436787	0.00329789	0.0159818	0.000162876	0.000493564
SP_1546	SP_1546	15901389	conserved_domain_protein	Unknown	182	19.8	5.19	82	231	15	High	0	98.177	805.04	273105120	283510400	284153632	167796880	152188432	146807760	521470624	384646720	449064224	238419744	213905120	226505968	0.555198	0.000148298	0.00314391	0.500915	0.00183479	0.0113274	3.40729e-06	2.52392e-05
SP_1578	SP_1578	15901420	hypothetical protein	Cytoplasmic	252	27.9	9.38	55	89	13	High	0	80.957	276.86	129907464	138235712	123839792	18146340	20665918	15305645	88179248	94951192	88741504	6636112	9289795	7018801	0.138062	2.79022e-05	0.00179235	0.0843953	2.02256e-05	0.0013807	6.95062e-09	2.74642e-07
SP_1587	SP_1587	15901429	oxalate:formate antiporter	CytoplasmicMembrane	408	44.2	9.19	4	14	1	High	0	13.727	55.85	11357596	11583198	10021906	3.97321e+06	4229327	4.4157e+06	4.16716e+06	3581746	4.38804e+06	2.32307e+06	2.12154e+06	2851312	0.382803	6.22459e-05	0.00244438	0.601133	0.00855843	0.0306068	7.34624e-07	8.01408e-06
SP_1634	SP_1634	15901470	hypothetical protein	Cytoplasmic	357	41	5.87	12	8	4	High	0	13.715	14.79	570113	286119	352443	151791	125124	118038	488863	481883	460357	187812	182230	255402	0.326765	0.00768023	0.0314215	0.437036	0.0015489	0.0101592	0.000253851	0.000710073
SP_1651	tpx	255964977	thiol peroxidase	Unknown	163	18	4.93	47	130	10	High	0	57.518	485.62	173008576	136454496	157372544	36436312	38310872	36722912	230496944	178541632	203975024	47274540	42868404	42604884	0.238778	3.55302e-05	0.00185931	0.21655	4.69812e-05	0.00209571	2.7189e-08	7.76829e-07
SP_1700	SP_1700	15901534	phospho-2-dehydro-3-deoxyheptonate aldolase (EC:2.5.1.54)	Cytoplasmic	343	38.7	5.16	70	382	21	High	0	207.619	1474.61	268290960	309899904	264630464	177347104	173512688	183083632	278490208	258767360	284702624	189618064	182271728	177473328	0.633519	0.00100833	0.008882	0.668357	0.000315299	0.00451032	7.25514e-06	4.43795e-05
SP_1701	SP_1701	15901535	phospho-2-dehydro-3-deoxyheptonate aldolase (EC:2.5.1.54)	Cytoplasmic	343	38.8	5.49	70	313	23	High	0	160.534	971.01	173008576	174332288	164948752	112365120	112593344	106852752	193577440	160951344	185265936	111919648	105662992	117264400	0.647702	5.80137e-05	0.00241586	0.620323	0.00168268	0.0107857	7.76367e-06	4.61209e-05
SP_1714	SP_1714	15901548	GntR family transcriptional regulator	Unknown	121	14	6.32	64	58	10	High	0	50.899	172.85	27749944	27880900	27510526	14830895	13468928	12459934	31497926	29866410	31873440	10839313	9648205	8911116	0.490246	0.000144528	0.0031292	0.315308	4.34495e-05	0.00209571	7.08349e-08	1.51789e-06
SP_1735	fmt	15901567	methionyl-tRNA formyltransferase (EC:2.1.2.9)	Cytoplasmic	311	34	5.36	76	282	25	High	0	142.478	896.2	169540624	186964032	170360544	106065632	98281048	95035160	205873536	165480976	193143920	89857856	87036336	81826552	0.568232	0.000241031	0.00407308	0.45832	0.00038397	0.00506064	1.83169e-06	1.57002e-05
SP_1736	SP_1736	15901568	primosome assembly protein PriA	Cytoplasmic	798	90	6.43	22	67	11	High	0	55.778	240.93	9532369	7258016	8181514	4513484	5515426	5.59659e+06	9115594	9421574	9393221	6.56064e+06	5.53816e+06	5.89376e+06	0.625724	0.011264	0.0406618	0.644193	0.000944687	0.00789769	0.000323025	0.000869126
SP_1871	SP_1871	15901699	iron-compound ABC transporter ATP-binding protein	CytoplasmicMembrane	250	28.5	5.83	43	52	12	High	0	60.179	170.77	33548116	40026212	33854088	875784	2073055	1.35295e+06	16694733	17923772	16981058	96089.9	na	108047	0.0400433	0.000212729	0.00393717	0.00593426	2.26109e-06	0.000492095	9.5597e-08	1.81307e-06
SP_1872	SP_1872	15901700	iron-compound ABC transporter iron-compound-binding protein	CytoplasmicMembrane	321	34.8	5.67	71	295	26	High	0	183.278	979.68	567265152	754139840	628627328	42126288	50585300	34986920	624228224	505703040	610424768	25266938	26517320	23785212	0.0654853	3.54225e-05	0.00185931	0.0434218	1.8407e-06	0.000492095	2.08727e-09	1.39151e-07
SP_1959	ndk	15901782	nucleoside diphosphate kinase (EC:2.7.4.6)	Cytoplasmic	137	15.4	5.17	89	189	11	High	0	101.09	629.13	72469312	78138520	69297920	44129852	41962456	43571892	114132240	118444512	106474944	63458492	69710536	72633328	0.589635	0.000158994	0.00326639	0.606994	0.000594528	0.00597765	2.07958e-07	3.14212e-06
SP_2021	pcsB	15901842	glycosyl hydrolase	Cytoplasmic	469	55.2	5.9	15	16	6	High	0	21.399	29.76	2.12804e+06	2339975	2.04473e+06	237404	679985	490431	4.38597e+06	3.24817e+06	4.32879e+06	1.26096e+06	1.40594e+06	1335152	0.216164	0.00668114	0.02919	0.334537	0.000454959	0.00545177	7.91169e-05	0.000280888
SP_2054	SP_2054	15901874	hypothetical protein	Cytoplasmic	121	15.1	4.82	16	7	2	High	0.002	9.466	16.28	1.87971e+06	1.72908e+06	1.77888e+06	768964	952024	870568	2.65393e+06	2455266	2.58052e+06	1.32244e+06	1.22444e+06	1.47661e+06	0.481016	0.000383009	0.00525747	0.523231	0.000383244	0.00506064	8.22599e-07	8.58365e-06
SP_2064	SP_2064	15901883	HAD superfamily hydrolase	Unknown	206	23.5	4.73	42	64	8	High	0	35.009	229.1	22073350	27644936	19991972	14830895	14178426	14479744	18273360	14544674	17868872	10434250	10185677	9266925	0.623855	0.00876903	0.0345428	0.589637	0.00295388	0.0148073	0.000100552	0.000337991
SP_2073	SP_2073	15901892	ABC transporter ATP-binding protein/permease	CytoplasmicMembrane	588	65.6	5.55	36	147	20	High	0	114.56	465.71	78102320	73931536	75015856	44901048	39832440	37727892	71613480	58262864	71202416	35024896	34965764	38229648	0.539359	0.000328377	0.00490881	0.538199	0.00113602	0.0087095	6.52352e-06	4.08775e-05
SP_2075	SP_2075	15901893	ABC transporter ATP-binding protein/permease	CytoplasmicMembrane	564	62.1	8.12	49	244	28	High	0	146.695	718.73	84430408	85339288	83973520	55882560	58600448	55157712	111424296	101097792	112385600	60994440	71214456	72726216	0.668553	2.92064e-05	0.00179235	0.630749	0.00206166	0.0120714	4.84216e-06	3.26438e-05
SP_2096	SP_2096	15901911	M2/M25/M4 family peptidase	Cytoplasmic	376	41.6	5.1	29	130	8	High	0	64.941	485.83	73173952	65061200	69405736	35668920	39832440	37362412	63553184	59826504	63121540	26035588	25181940	29193346	0.543553	0.000198587	0.00379595	0.431155	6.5221e-05	0.0024183	1.29171e-07	2.21435e-06
SP_2097	SP_2097	15901912	2,3,4,5-tetrahydropyridine-2,6-carboxylate N-succinyltransferase	Cytoplasmic	232	23.9	4.78	75	200	12	High	0	83.349	762.15	298527392	283510400	283067488	169388064	155234944	160416432	304598944	265203472	297499968	117674024	128586600	141359440	0.560671	4.75523e-05	0.00213254	0.446926	0.000290776	0.00436583	5.33863e-07	6.21977e-06
SP_2156	SP_2156	15901966	SPFH_domain/Band_7_family	CytoplasmicMembrane	294	33	5.8	79	608	31	High	0	222.551	1867.15	816741440	1004125824	847486912	546149248	525042944	479575200	879401408	674219264	813062272	397538816	394431936	415829760	0.58117	0.00190574	0.0128444	0.510335	0.00115982	0.00880657	2.4157e-05	0.000107763
SP_2206	yifA	15902013	ribosomal subunit interface protein	Cytoplasmic	182	21.1	5.17	62	318	18	High	0	145.162	1183.38	273105120	331090016	283067488	186909856	188744848	176737904	372086080	339110432	366399072	235778512	205121296	204307648	0.622581	0.00167036	0.0117231	0.598747	0.000736655	0.00664689	1.32023e-05	6.87602e-05
SP_2239	htrA	15902042	serine protease	Unknown	393	41.8	6.96	56	217	17	High	0	140.906	881.11	73878224	64815572	68542872	31072986	35978072	36722912	92632424	89818600	101549240	37341908	35587672	38695188	0.500751	0.000434452	0.00553778	0.393045	2.95856e-05	0.00163411	2.01967e-07	3.10719e-06
SP_x1750	SP_x1750	na	anotationx1750: Conserved domain protein, homologue to SP_1775	Extracellular	73	8.7	4.83	36	24	3	High	0	12.362	75.71	7370144	5366375	5701825	2.76784e+06	2.57911e+06	2.44685e+06	8790114	7.86197e+06	9185954	4.19084e+06	3.34098e+06	4.23273e+06	0.422695	0.00118782	0.00946685	0.455319	0.000929896	0.00789769	9.12456e-06	5.23898e-05
